# Supplementary material for: Ternary nanocomposite-based reduced graphene oxide/chitosan/Cr2O3 for the simultaneous determination of dopamine, uric acid, xanthine, and hypoxanthine in fish meat
Source: Royal Society of Chemistry journal article supplement (doi:10.1039/d0ay00161a), 2020-01-01
Supplement: d0ay00161a1.pdf [file d0ay00161a1.pdf]

**Ternary nanocomposite based reduced graphene oxide/Chitosan/Cr<sub>2</sub>O<sub>3</sub> for simultaneous determination of Dopamine, Uric acid, Xanthine, and Hypoxanthine in fish meat**

Kh. Ghanbari<sup>a,\*</sup>, F. Nejabati

*<sup>a</sup> Department of Chemistry, Faculty of physics and chemistry, School of Science, Alzahra University, Vanak, Tehran 1993891167, Iran*

---

\*Corresponding author. Tel.: +98 21 88044040; fax: +98 21 88035187.  
E-mail address: kh.ghanbari@alzahra.ac.ir, (kh\_ghanb@yahoo.com ).

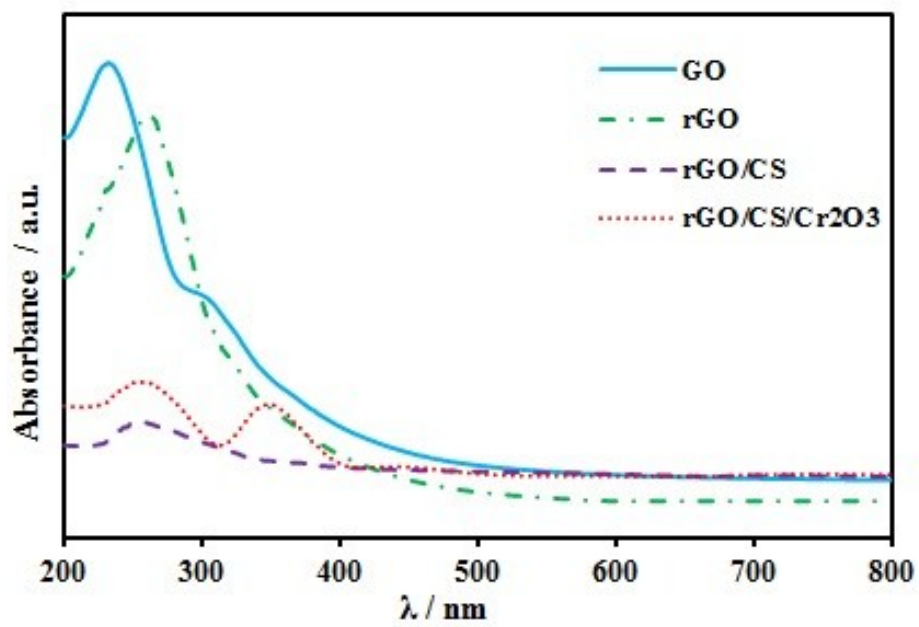

**Fig. S1.** UV-vis spectra of GO, rGO, rGO/CS, and rGO/CS/Cr<sub>2</sub>O<sub>3</sub>.

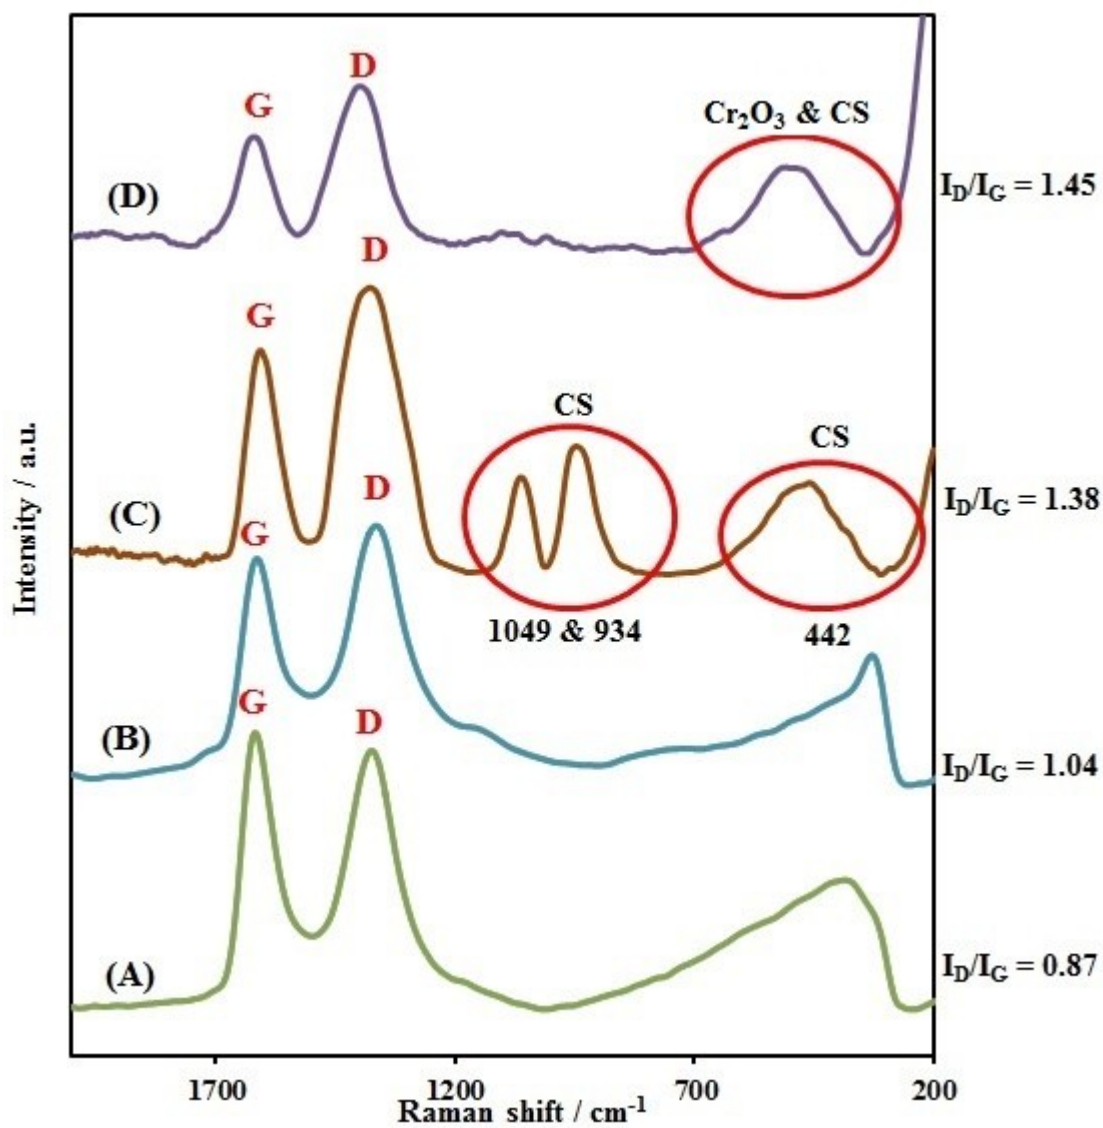

Fig. S2. Raman spectra of GO (A), rGO (B), rGO/CS (C), rGO/CS/Cr<sub>2</sub>O<sub>3</sub> (D).

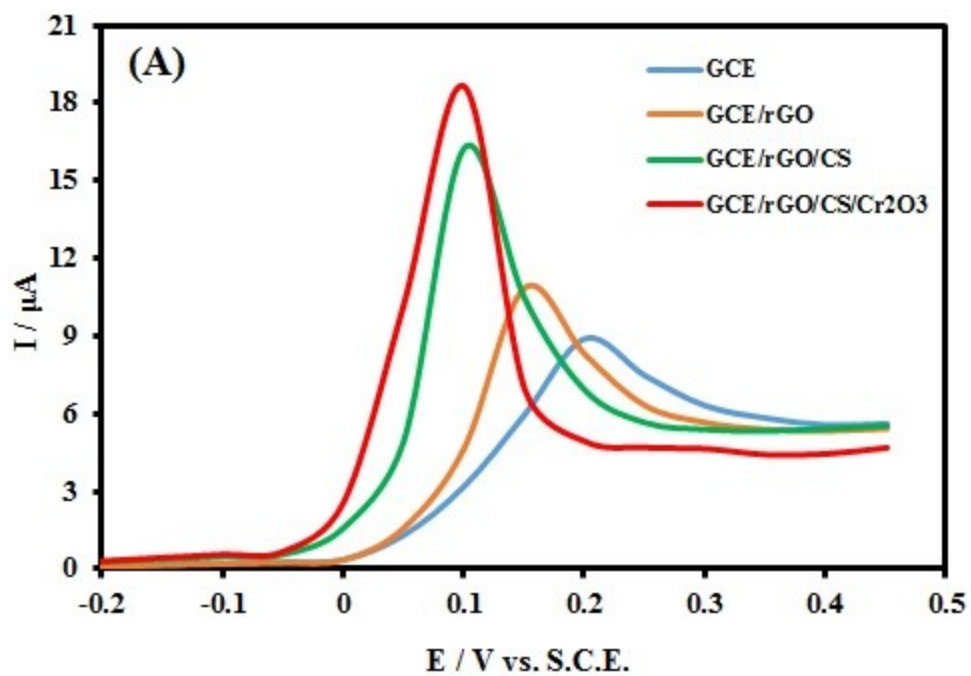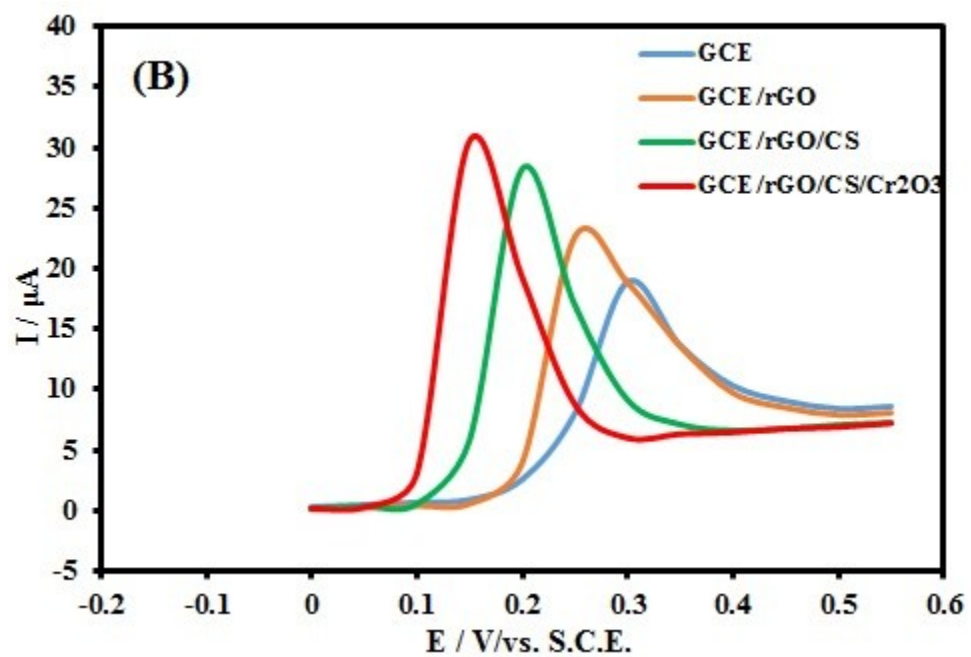

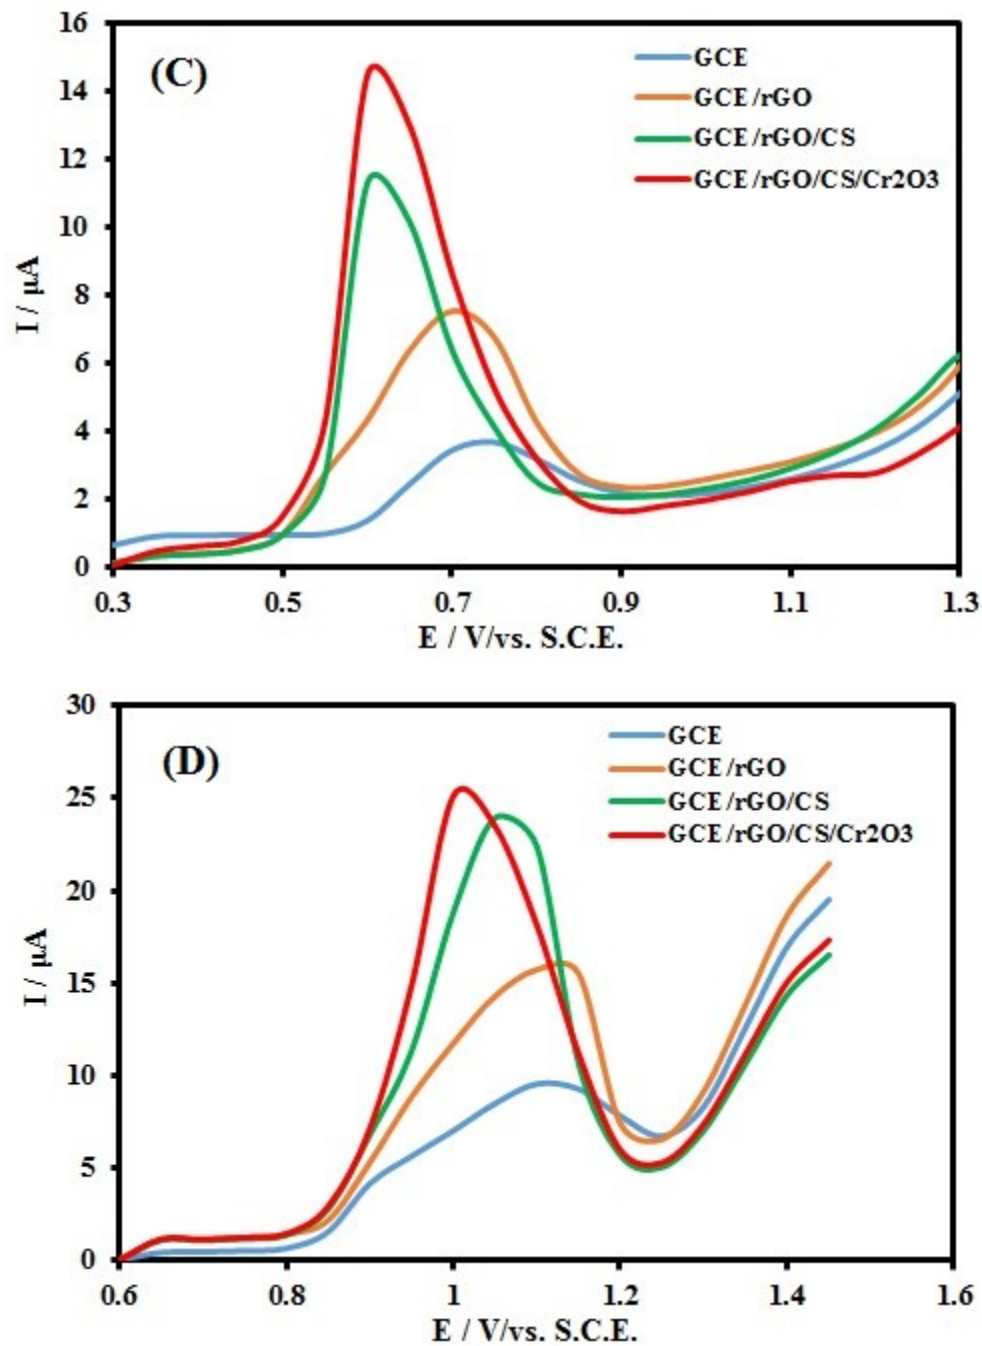

**Fig. S3** Differential pulse voltammograms of the 200 μM DA (A), 500 μM UA (B), 500 μM XN (C), and 500 μM HXN (D) in PBS solution (pH=7, 0.1 M) at GCE, GCE/rGO, GCE/rGO/CS, GCE/rGO/CS/Cr<sub>2</sub>O<sub>3</sub>.

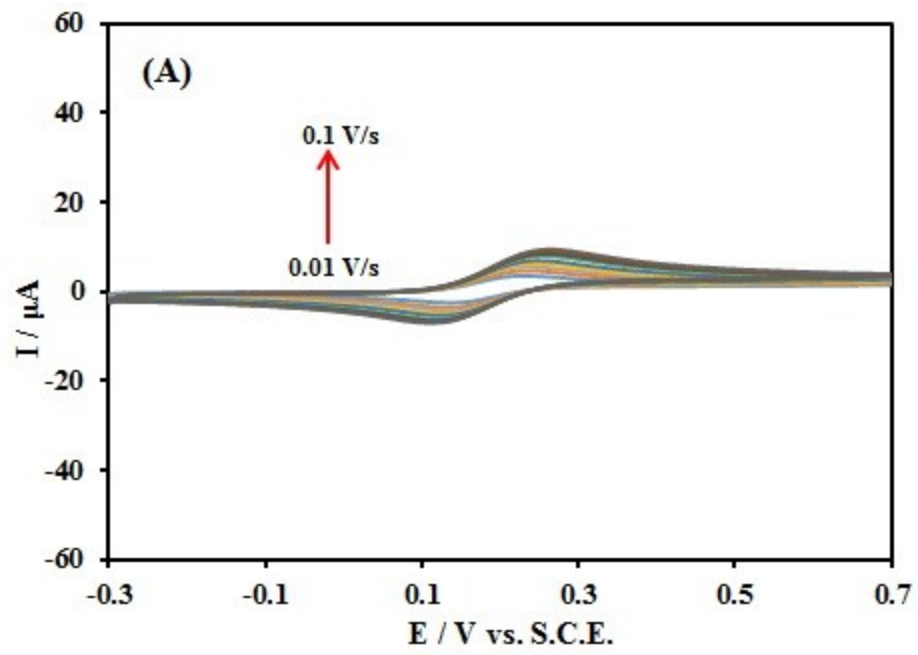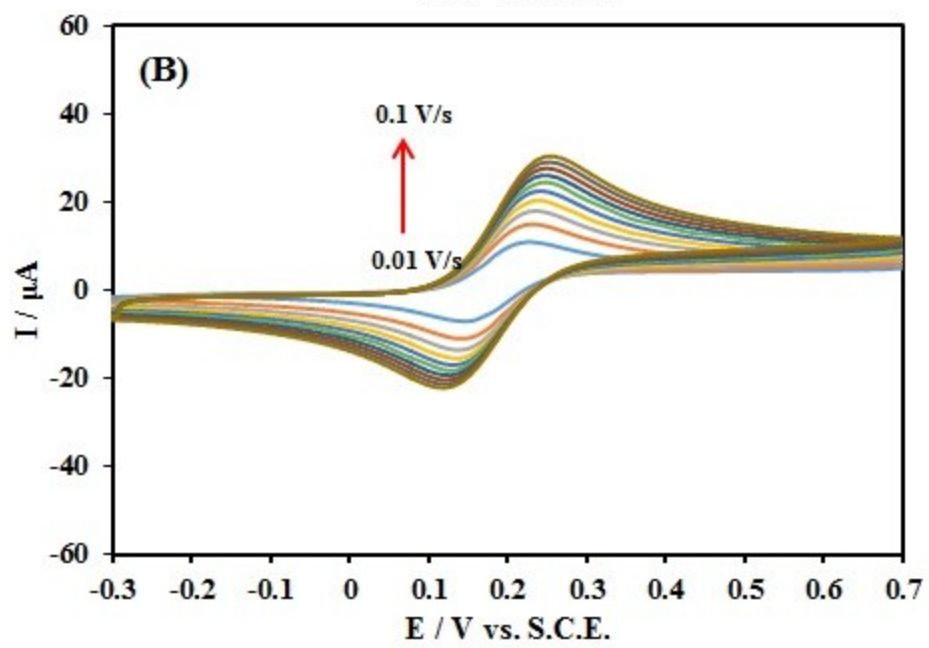

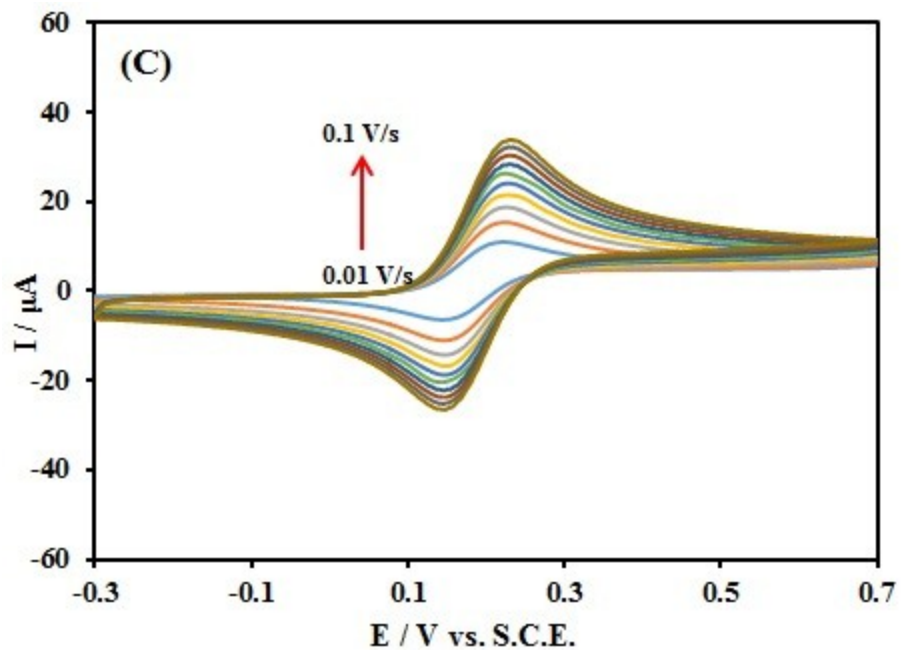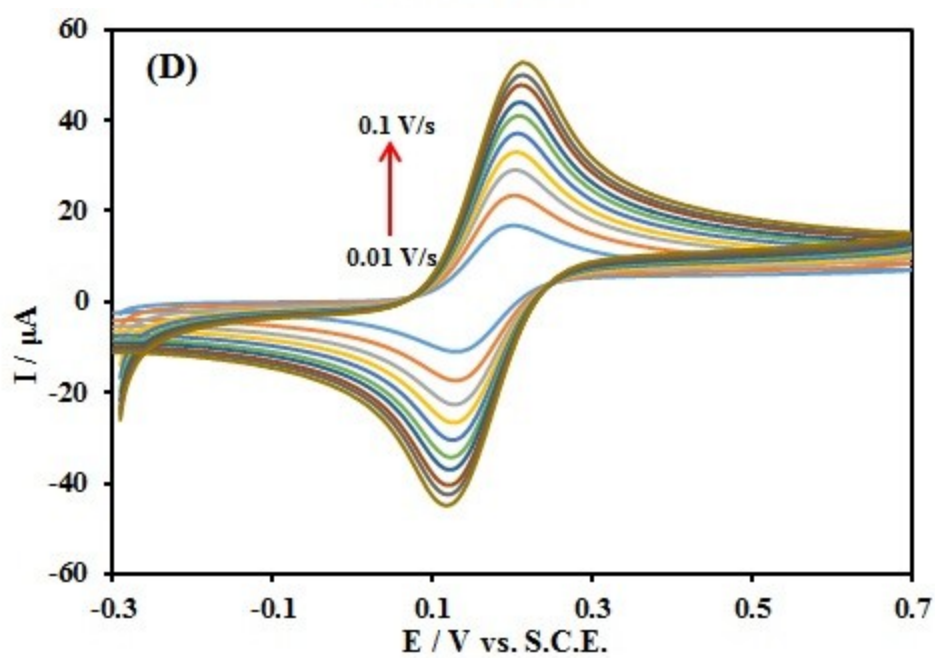

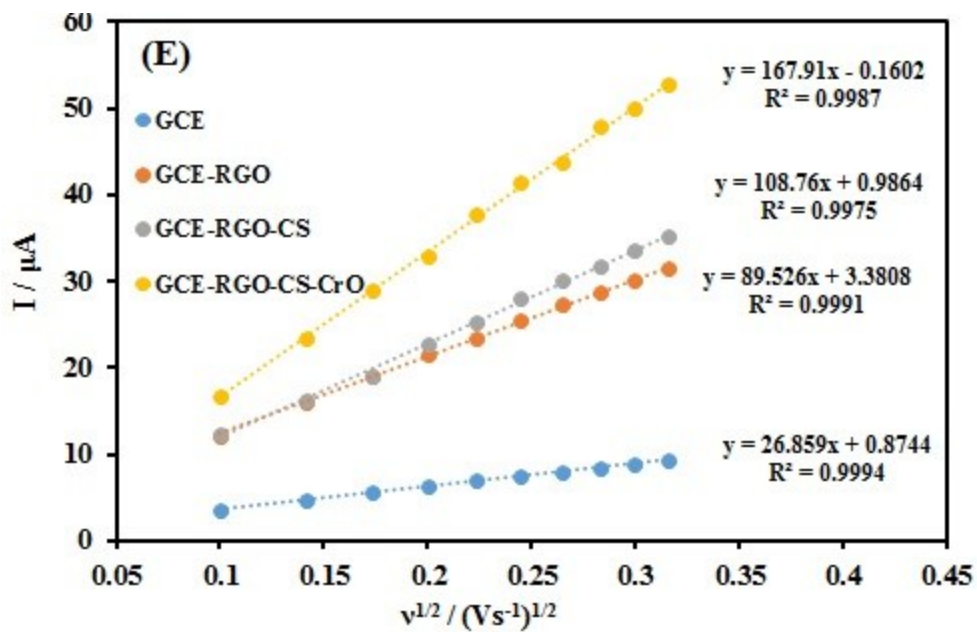

**Fig. S4.** Cyclic voltammograms obtained using GCE (A), GCE/rGO (B), GCE/rGO/CS (C), GCE/rGO/CS/Cr<sub>2</sub>O<sub>3</sub> (D) in 0.1 M KCl solution containing 5.0 mM Fe(CN)<sub>6</sub><sup>3-/4-</sup> by using different potential scan rates. The plots of  $I_p$  vs.  $v^{1/2}$  (E).



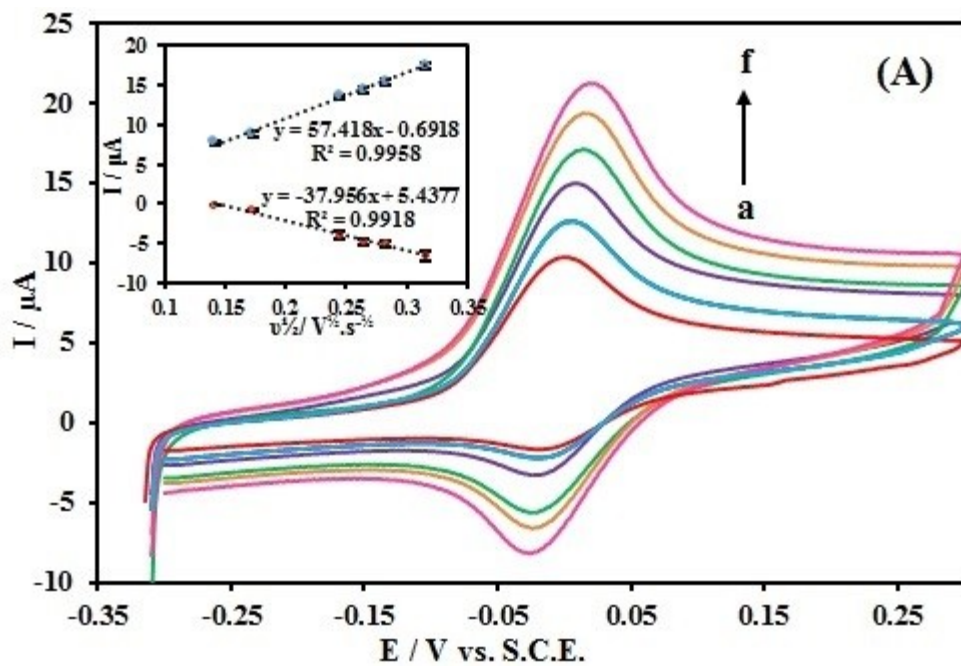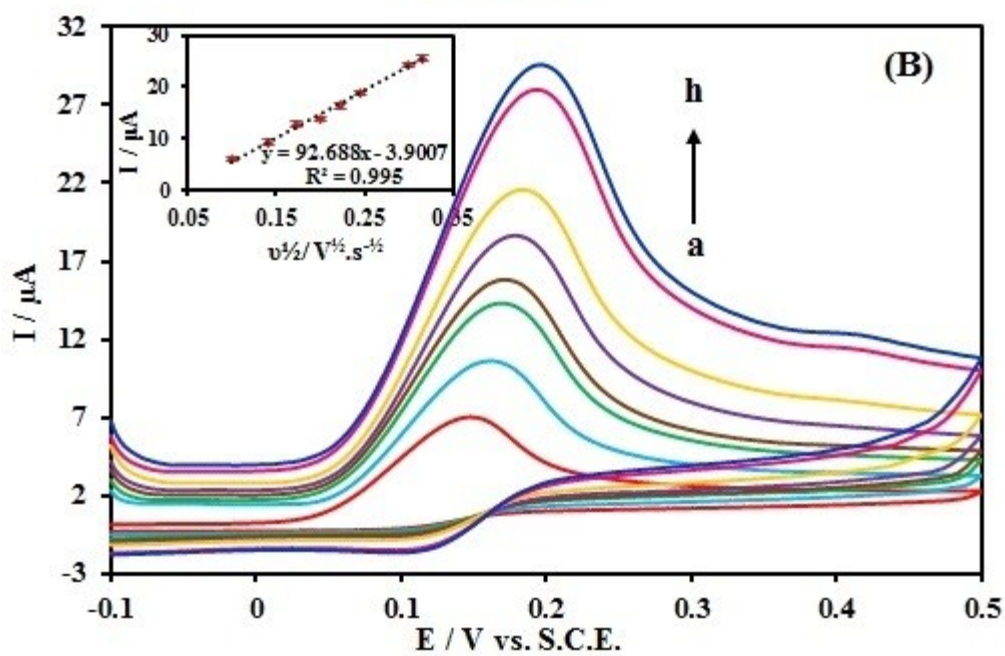

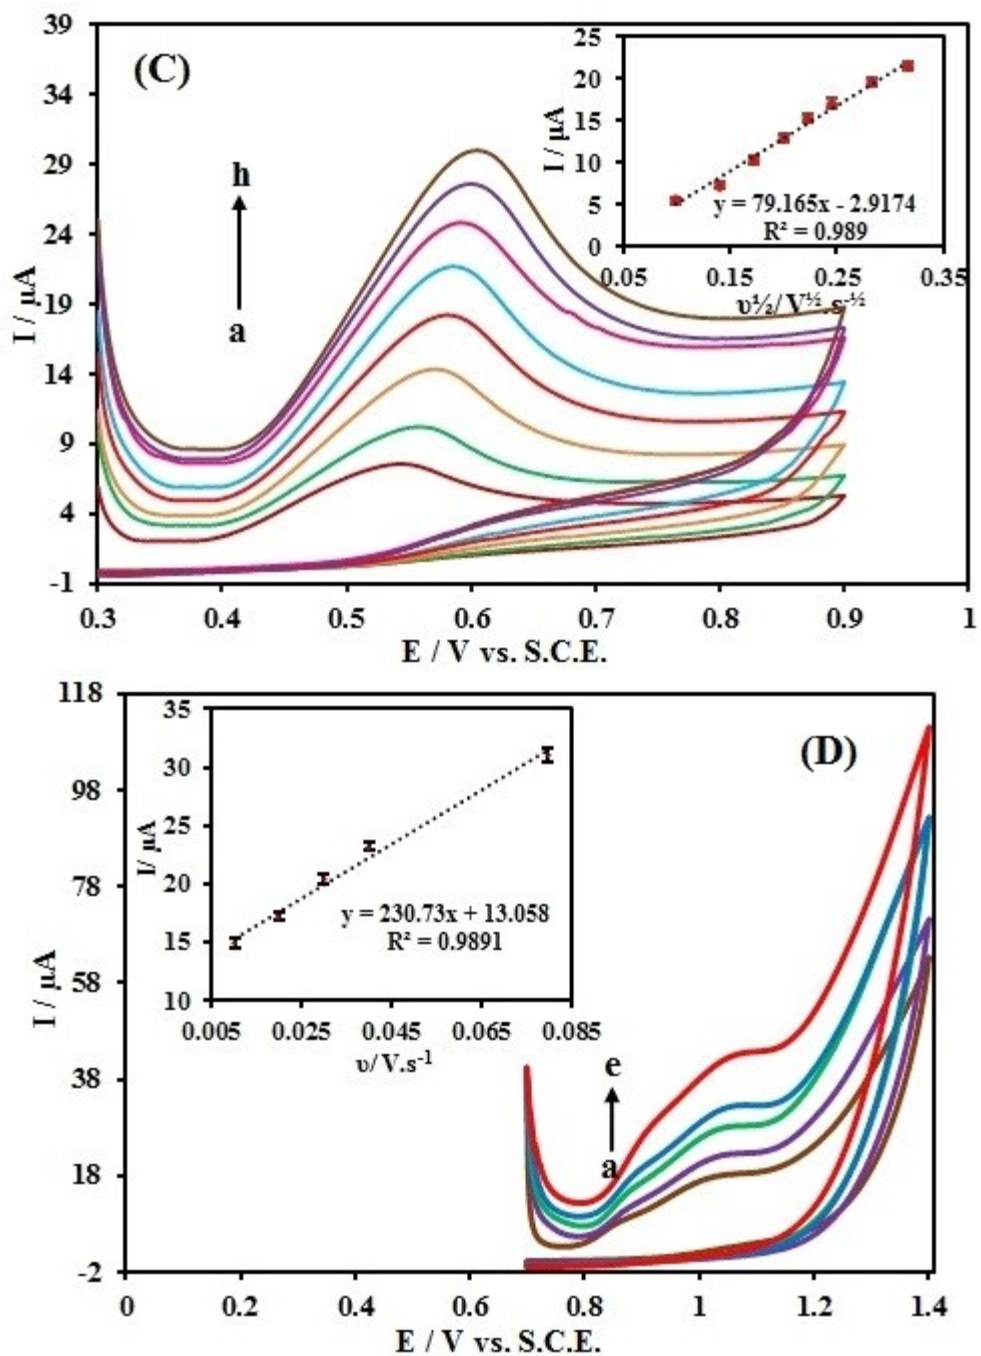

**Fig. S5.** Cyclic voltammograms of the 500  $\mu\text{M}$  DA (A), 1.0 mM UA (B), 500  $\mu\text{M}$  XN (C), and 500  $\mu\text{M}$  HXN (D) at the GCE/rGO/CS/Cr<sub>2</sub>O<sub>3</sub> in 0.1 M PBS (pH 7.0) at different scan rates, a to h (0.01 to 0.9 V s<sup>-1</sup>). Inset: a plot of  $I_p$  vs.  $v^{1/2}$  (in (A, B, and C)) and  $I_p$  vs.  $v$  (in (D)). Error bars indicate the standard deviations of three repeated measurements.

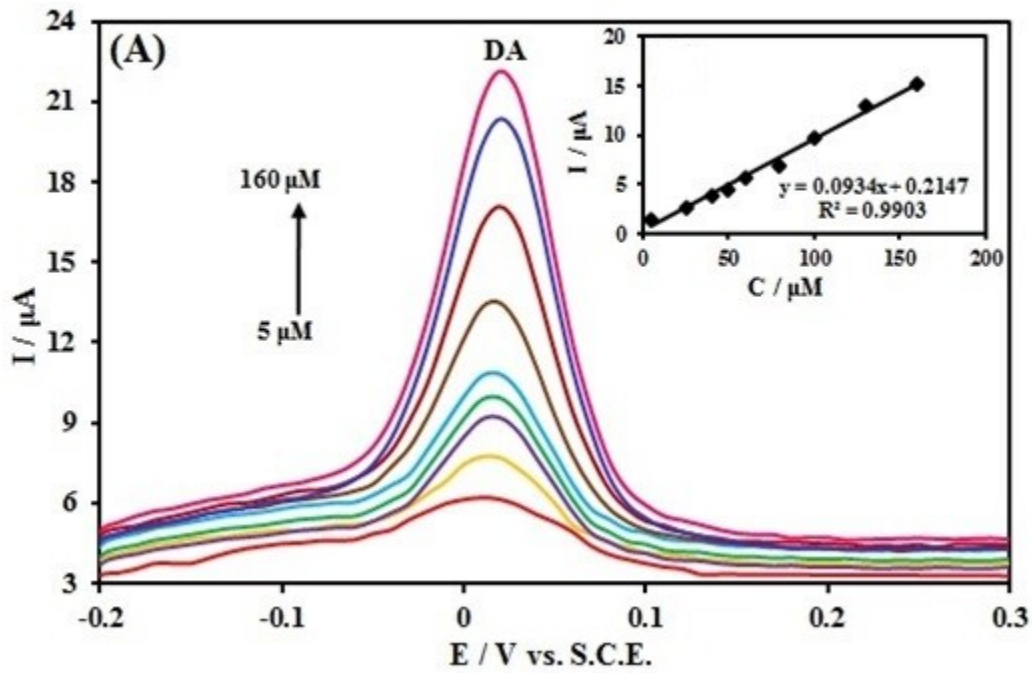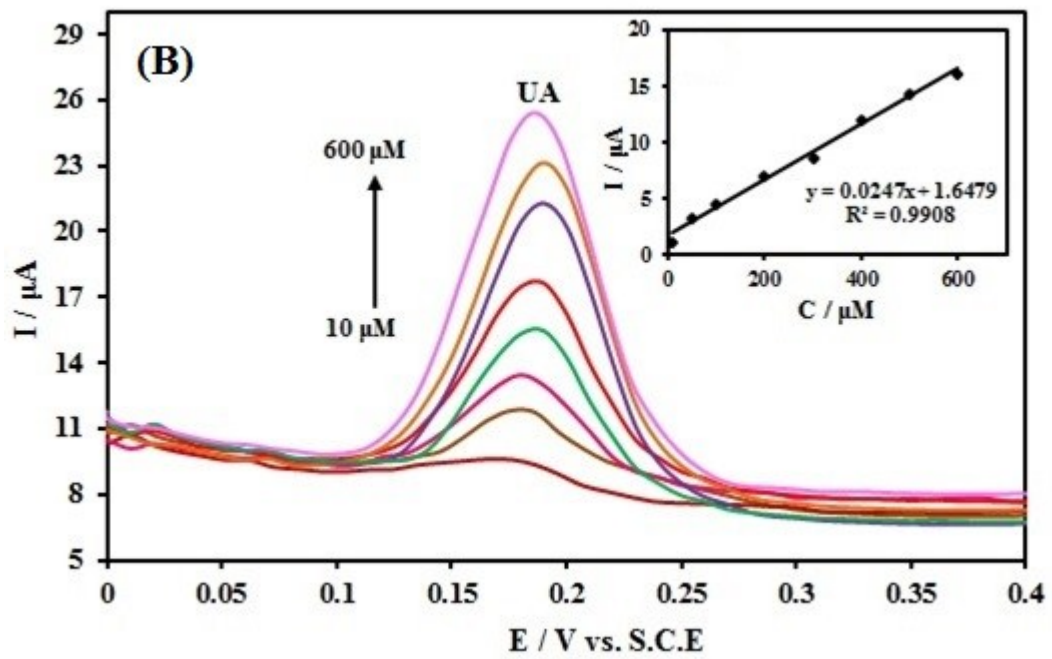

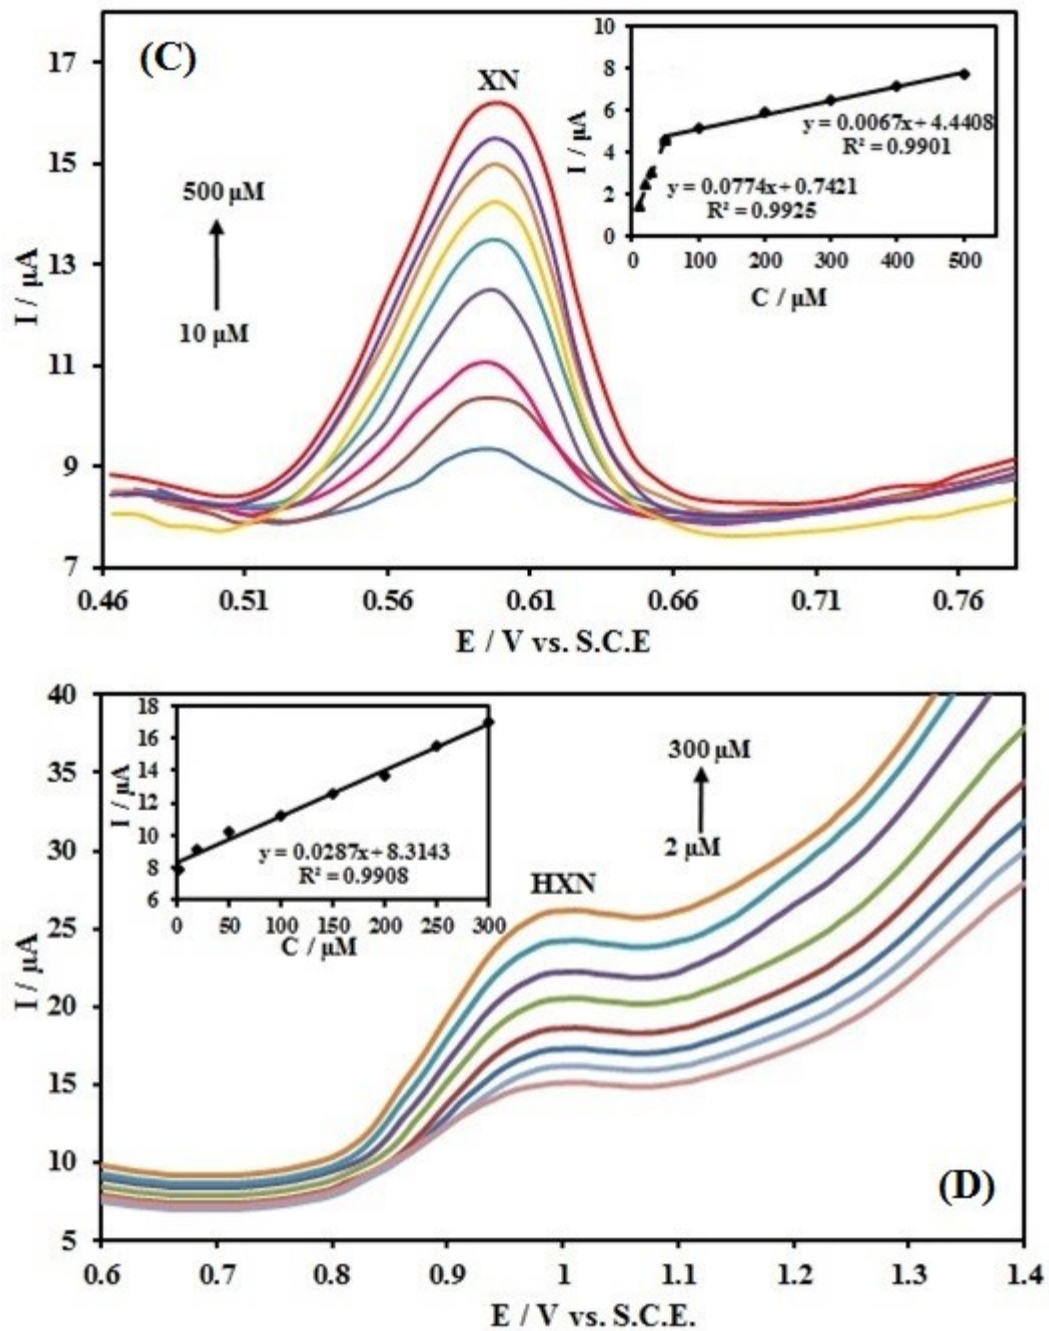

**Fig. S6.** DPVs of different concentrations of: (A) DA (5.0–160.0  $\mu\text{M}$ ), (B) UA (10.0–600.0  $\mu\text{M}$ ), (C) XN (10.0–500.0  $\mu\text{M}$ ), and (D) HXN (2.0–300.0  $\mu\text{M}$ ) at the GCE/rGO/CS/CrO<sub>2</sub> in PBS (pH=7, 0.1M). DPV experimental conditions: pulse amplitude of 0.05 V, pulse time of 0.1 s, sweep rate of 0.1 V s<sup>-1</sup>.

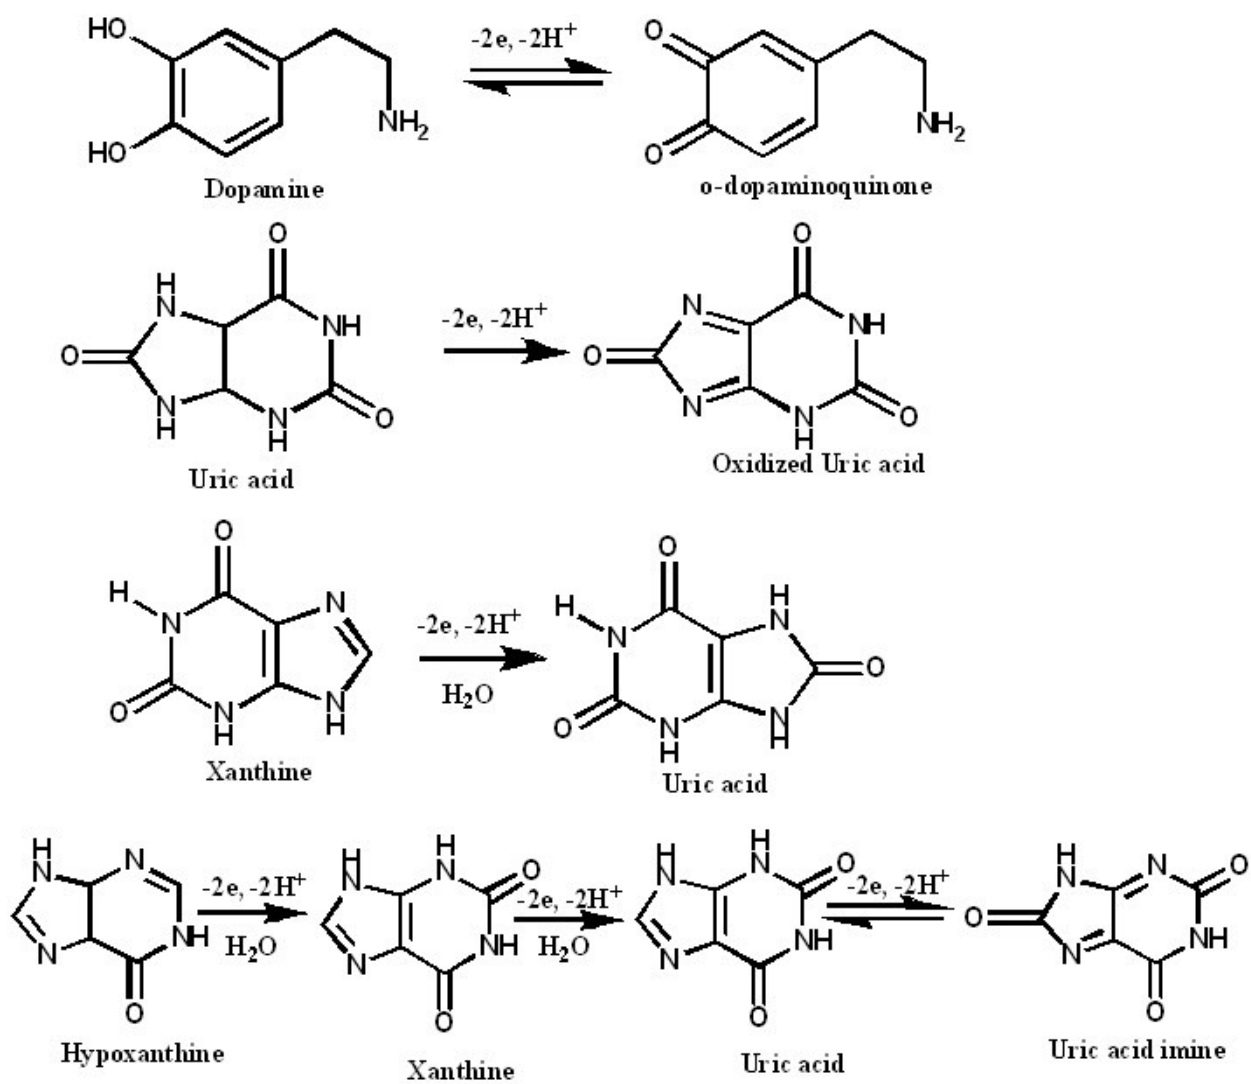

**Scheme S1.** Electrochemical oxidation of dopamine, uric acid, xanthine, and hypoxanthine.

**Table S1:** Interferences of some foreign substances for DA (100  $\mu\text{M}$ ), UA (400  $\mu\text{M}$ ), XN (300  $\mu\text{M}$ ), and HXN (200  $\mu\text{M}$ ).

| Interference<br>( $\mu\text{M}$ )            | Ip ( $\mu\text{A}$ ) |       |      |       | %E ( $\pm$ ) |      |      |      |
|----------------------------------------------|----------------------|-------|------|-------|--------------|------|------|------|
|                                              | DA                   | UA    | XN   | HXN   | DA           | UA   | XN   | HXN  |
| <b>NaCl (1800)</b>                           | 9.11                 | 13.33 | 5.23 | 14.47 | 1.7          | 3.74 | 1.95 | 2.48 |
| <b>KCl (1800)</b>                            | 8.84                 | 12.40 | 4.89 | 14.77 | 4.64         | 3.5  | 4.68 | 4.6  |
| <b>CaCl<sub>2</sub> (1600)</b>               | 8.96                 | 12.50 | 4.93 | 13.61 | 3.34         | 2.72 | 3.9  | 3.61 |
| <b>MgSO<sub>4</sub> (1600)</b>               | 9.02                 | 12.31 | 5.15 | 14.59 | 2.7          | 4.2  | 0.39 | 3.32 |
| <b>Zn(NO<sub>3</sub>)<sub>2</sub> (1600)</b> | 9.08                 | 12.44 | 4.93 | 14.68 | 2.05         | 3.19 | 3.9  | 3.97 |
| <b>Glucose (800)</b>                         | 9.69                 | 12.57 | 5.12 | 14.46 | 4.53         | 2.18 | 0.19 | 2.41 |
| <b>Citric acid (800)</b>                     | 9.32                 | 13.07 | 5.25 | 14.56 | 0.54         | 1.71 | 2.34 | 3.12 |
| <b>Ascorbic acid (2000)</b>                  | 9.59                 | 13.08 | 5.04 | 14.28 | 3.45         | 1.79 | 1.75 | 1.13 |
|                                              | 9.27                 | 12.85 | 5.13 | 14.12 |              |      |      |      |
